# Supplementary material
Source: Springer Nature journal article supplement (https://www.springermedizin.de/resource/supplementary/12913_2013_3051_MOESM1_ESM.pdf/9532272)
Supplement: MOESM1 [file 9532272]

**Mechanism: Managerial control**

Approach to role: *Achieve Ministry standards*

View of AN: *Human tendency to neglect*

*"If there were no supervision, the ANs would stop doing many things that would affect the health programs we have implemented."*

Supervisor Activities

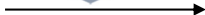

Outcomes in AN

|                                                                                                                                                                           |                                                                                                                                                                                                                                                                |
|---------------------------------------------------------------------------------------------------------------------------------------------------------------------------|----------------------------------------------------------------------------------------------------------------------------------------------------------------------------------------------------------------------------------------------------------------|
| HP visits<br>District meetings<br>Receive reports at health center<br>Help with paperwork<br>Action plans to improve coverage<br>Orient to sources of support for repairs | Internalize evaluation criteria as goals<br>Satisfaction from presenting coverage achieved in district meeting<br>Feel pressure in completion of paperwork<br>Feel supervisor supports them to be a better AN, but does not recognize full scope of their work |
|---------------------------------------------------------------------------------------------------------------------------------------------------------------------------|----------------------------------------------------------------------------------------------------------------------------------------------------------------------------------------------------------------------------------------------------------------|
